# Supplementary material for: A benchmarked protein microarray-based platform for the identification of novel low-affinity extracellular protein interactions
Source: PubMed Central journal article supplement (PMC3325482; doi:10.1016/j.ab.2012.01.034), 2012-05-01
Supplement: mmc1.pdf [file mmc1.pdf]

Additional data file 1 for:

**A benchmarked protein microarray-based platform for the identification of novel low affinity extracellular protein interactions.**

Yi Sun, Marcus Gallagher-Jones, Colin Barker and Gavin J. Wright

Design and construction of a bespoke loading apparatus.

All recombinant proteins for our binding studies are produced as secreted recombinant proteins using a mammalian expression system. Proteins are expressed by transient transfection resulting in the expression of 6His-tagged proteins in spent tissue culture in a volume of 50 ml. To purify a large number of His-tagged proteins in parallel, we used a commercially available 96-well microtitre plate containing Ni<sup>2+</sup>-NTA resin (His MultiTrap 96-well filter plate, GE Healthcare). However, because the holding volume of each well is limited to only ~ 500 microlitres, this makes loading 50 ml of supernatant through each well challenging. To address this, we designed and built a bespoke loading press.

The press was designed to be operated on a normal laboratory bench using pneumatics and consists of a frame constructed of 40x40 aluminium speed frame (Rose & Krieger), a pneumatic piston (we used a C(D)Q2, Compact Cylinder, Double Acting, Single Rod (SMC Pneumatics, UK)) attached to an ~ 25 mm thick aluminium plate and a holding base to contain the 96-well filter plate (Fig. S1A). The pneumatics system is required to have sufficient force to compress 96 fully-loaded 50ml syringes at a controlled speed of approx 1 ml min<sup>-1</sup>, which is the standard flow rate for protein purification using this resin. To achieve the required speed, high grade precision needle valves (SMC Pneumatics, UK) were used as the regulators. The movement of the pressure plate is relatively slow when in operation, so a set of digital vernier calipers were attached between the pressure plate and the main frame to enable visual indication and quantification of the movement rate. The transfection supernatants were loaded into 50 ml disposable plastic syringes and sited into metal loading bars (Fig. S1B, S1C) that were removable and therefore allowed sequential and convenient loading of all 96 syringes into the frame.

The filter plate assembly and fittings are made of aluminium and consist of a lower block with a drain outlet and a top plate held in position using four locator pins (Fig. S1D, S1E). The Ni<sup>2+</sup>-NTA filter plate is fixed between these two and bounded by two silicon membranes to ensure a tight seal and prevent well-to-well leakage (Fig. S1F). The top plate was drilled to make 96

tapped holes at a spacing that corresponded to the wells in the filter plate (Fig. S1G, S1H, S1I). Tubing and fittings were purchased from PTFE Parts Ltd, Cambridgeshire, UK: 1.6mm outer diameter, 1.0 mm microbore PTFE tubing were fixed to the top plate with acetal fittings and cone seals (Cat. Nos. 4-SPAN-001 and 4-PP-1012B). The other end of the tubing had a luer connection made using a microbore tubing adapter, end connector and fitting (Cat. Nos. 2-PP-0012-TUB, 4-PP-1056, 4-VP-BSFTLL-6) that could be attached directly to the syringes. Each connection was colour-coded and numbered to facilitate correct positioning.

Fig S1 A

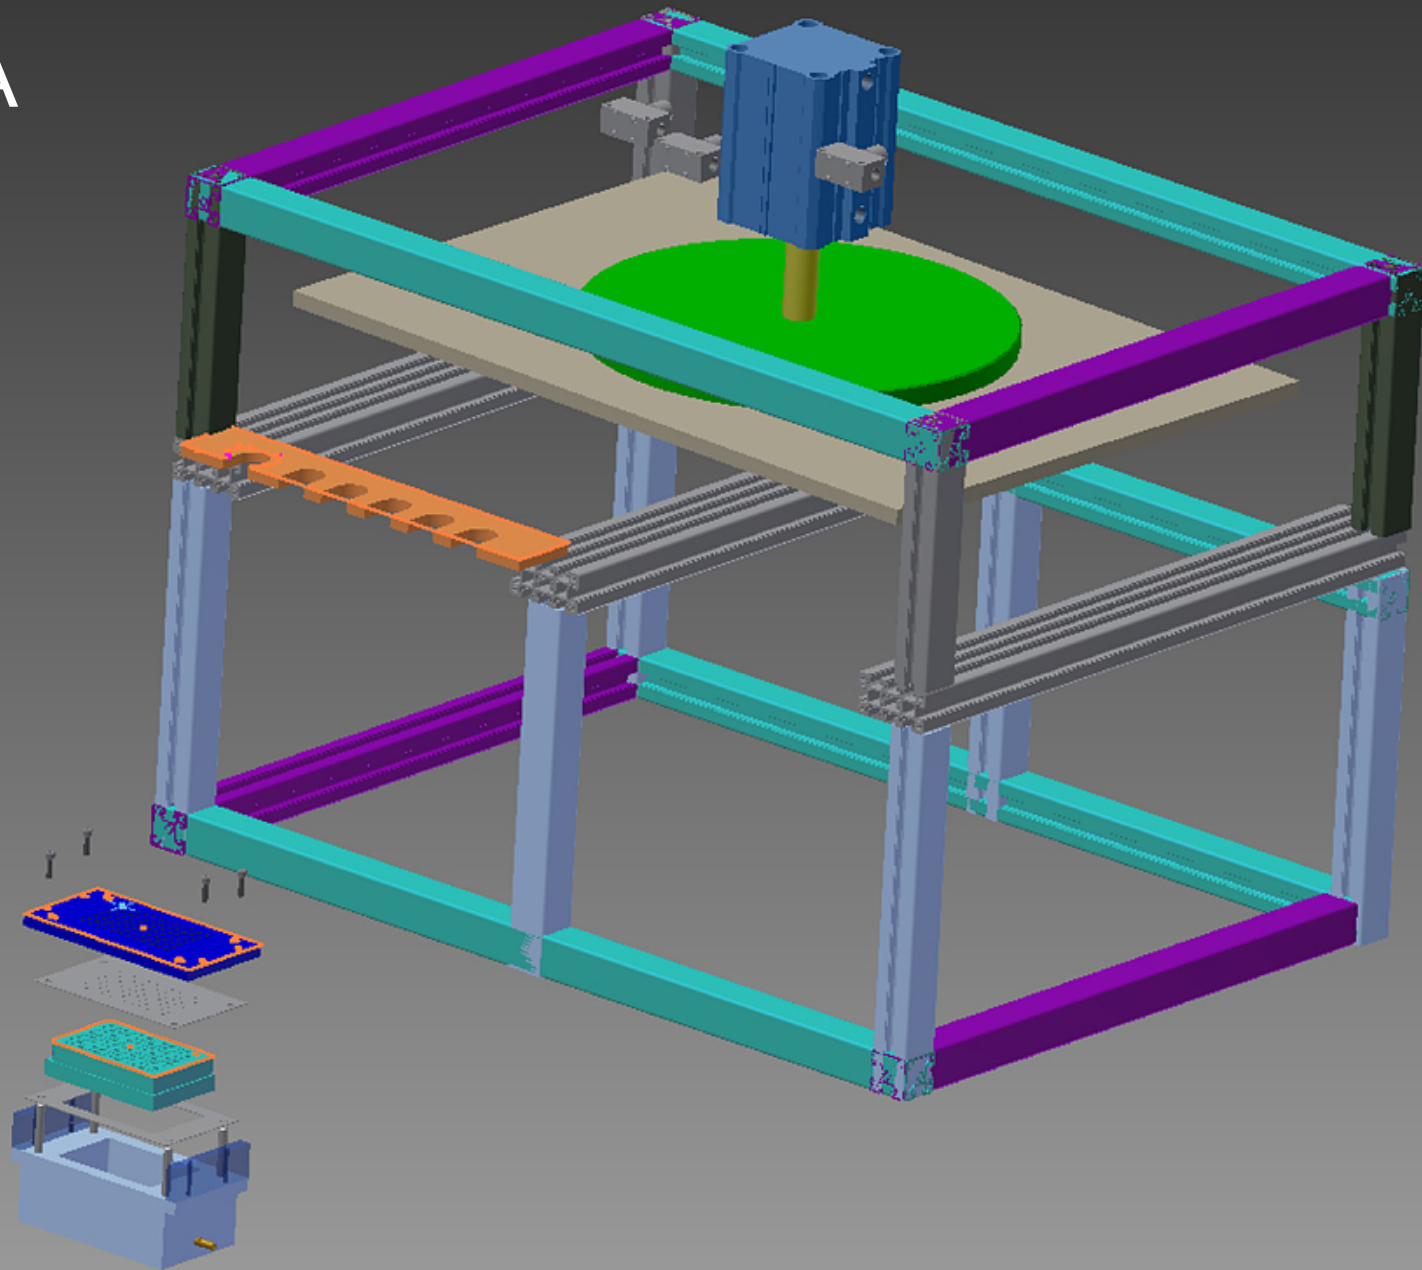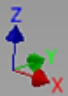

# Fig S1 B

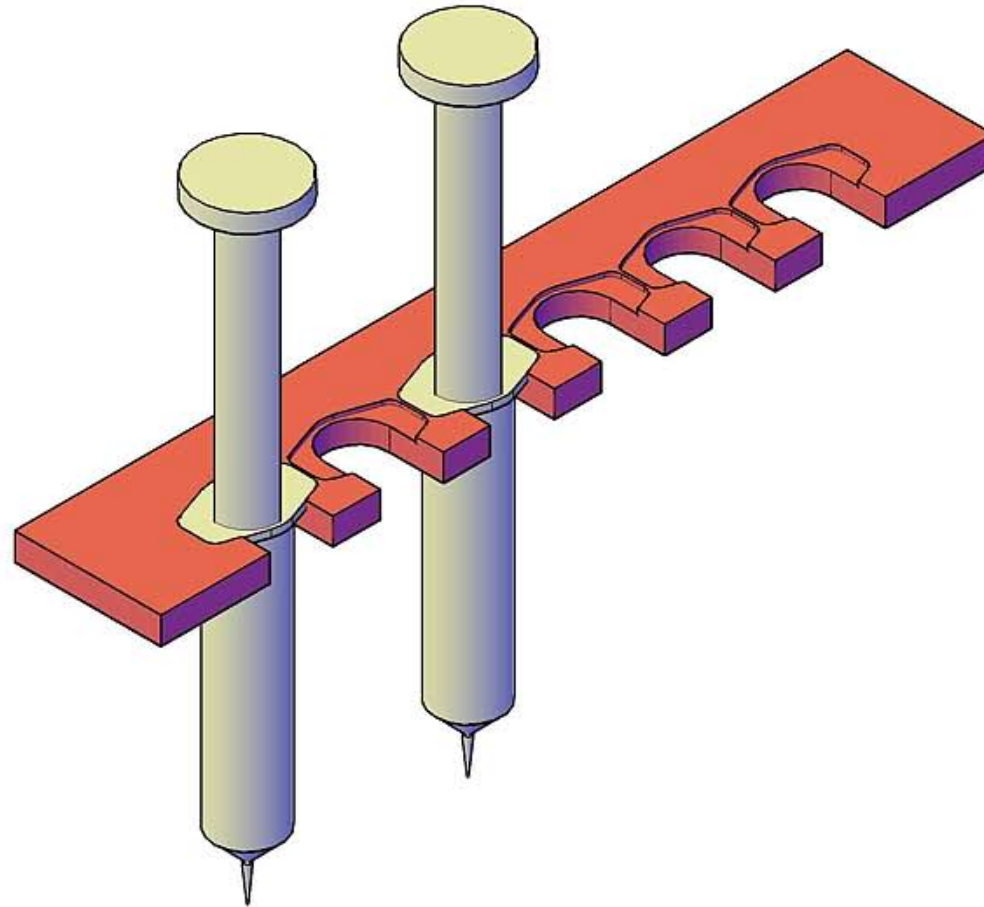

The Wellcome Trust Sanger Institute  
 Genome Campus  
 Hinxton  
 Cambs, BC6 1SA  
 Tel No 01223 834244  
 Fax No 01223494919

|       |               |
|-------|---------------|
| Scale | NTS           |
| Drawn | Date 16/06/09 |
| Chkd  | Date CB       |
| Appd  | Date          |

Tolerance unless othwise stated  
 Angular  $\pm 0.25$  deg  
 X.XX  $\pm 0.05$   
 X.X  $\pm 0.1$   
 X  $\pm 0.5$

|          |       |
|----------|-------|
| MATERIAL | AL/AL |
| FINISH   | Clean |

PROJECT No  
 WS-10-001

TITLE  
 SYRINGE HOLDER X 6

DRAWING No  
 GW -1-Assy

|        |   |
|--------|---|
| REV No | A |
|--------|---|

# Fig S1 C

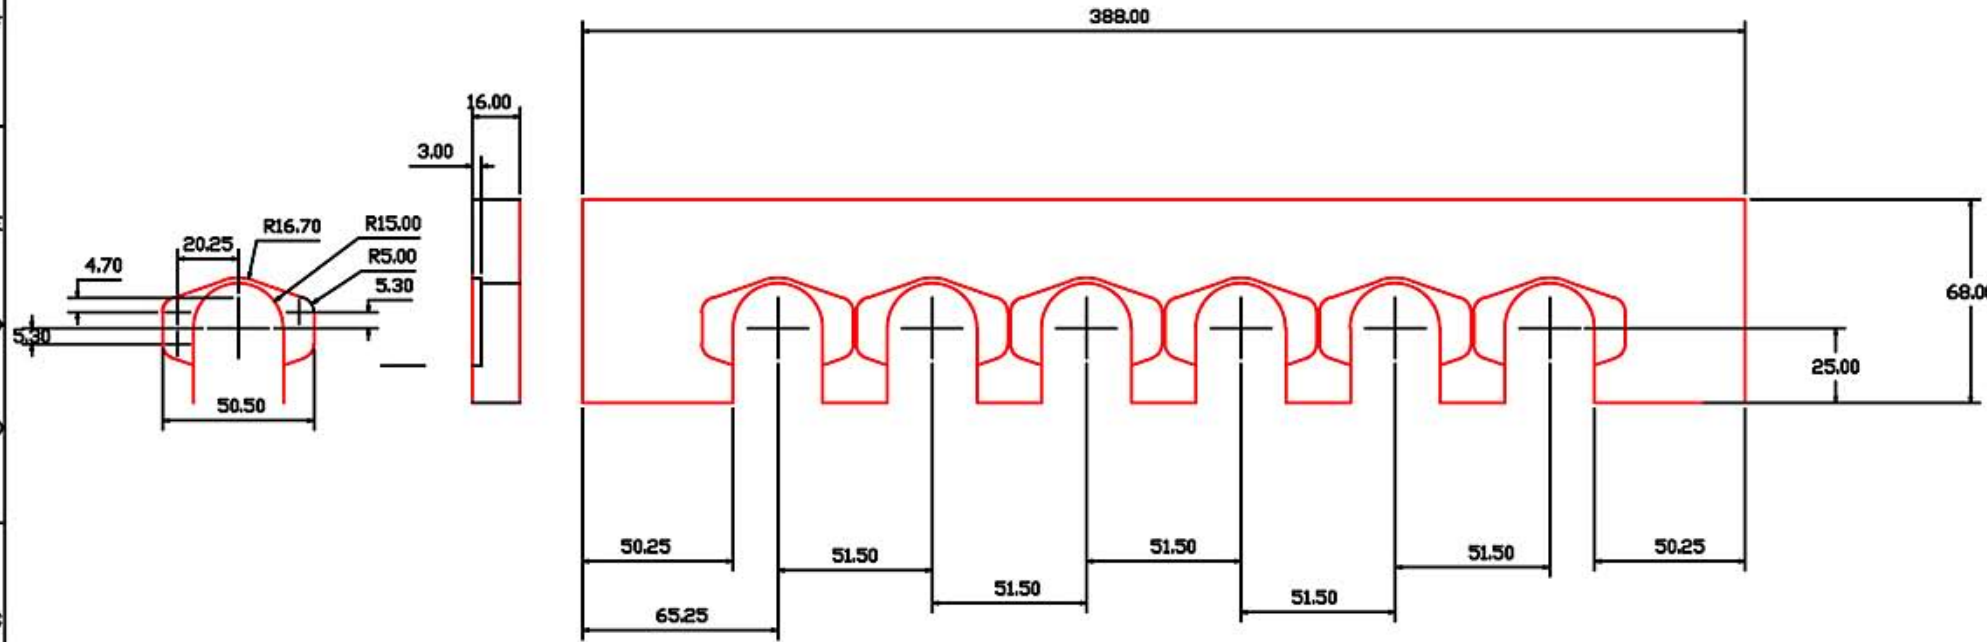

The Wellcome Trust Sanger Institute  
 Genome Campus  
 Hinxton  
 Cambs, BC6 1SA  
 Tel No 01223 834244  
 Fax No 01223494919

|       |               |
|-------|---------------|
| Scale | NTS           |
| Drawn | Date 18/06/09 |
| Chkd  | Date CB       |
| Appd  | Date          |

Tolerance unless othwise stated  
 Angular  $\pm 0.25$  deg  
 X.XX  $\pm 0.05$   
 X.X  $\pm 0.1$   
 X  $\pm 0.5$

|          |               |
|----------|---------------|
| MATERIAL | Tooling Plate |
| FINISH   | Clean         |

PROJECT No  
 WS-2010-01

TITLE  
 Syringe Holder

DRAWING No  
 2010-01

REV No  
 A

# Fig S1 D

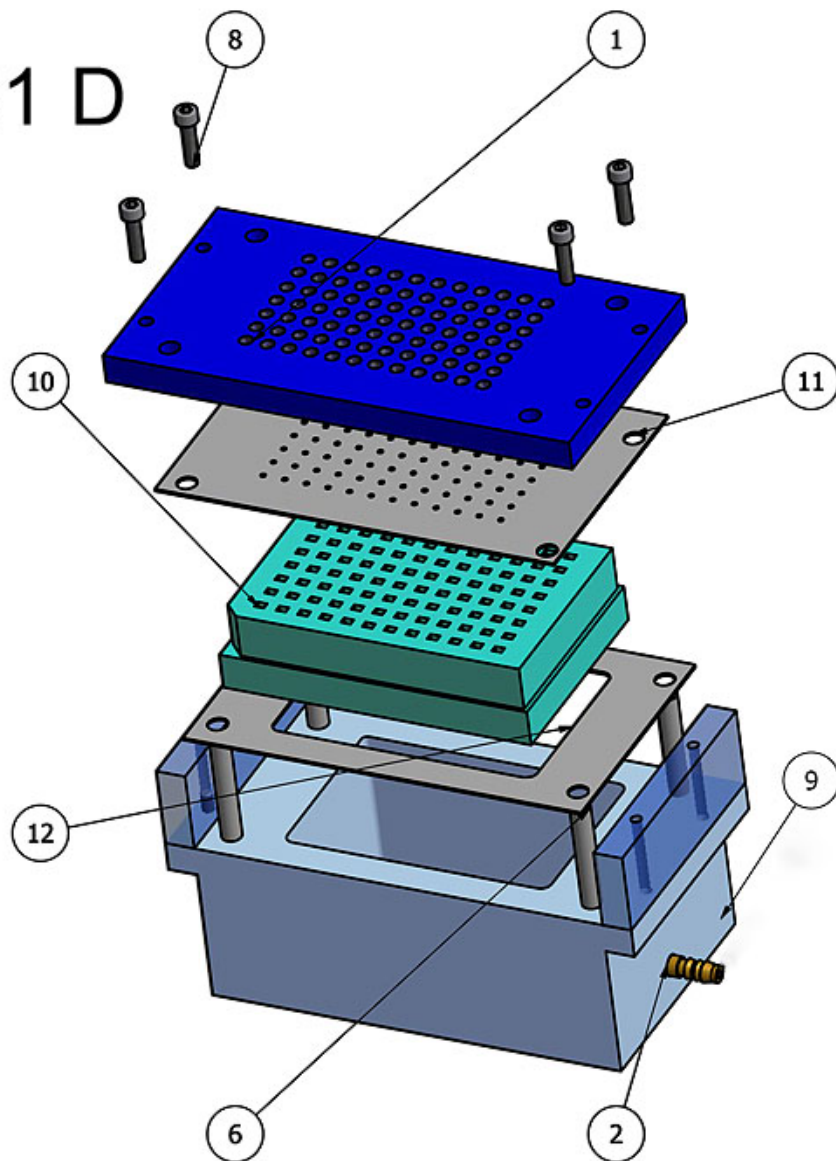

| PARTS LIST |     |                              |                                       |
|------------|-----|------------------------------|---------------------------------------|
| ITEM       | QTY | PART NUMBER                  | DESCRIPTION                           |
| 1          | 1   | Top plate                    |                                       |
| 2          | 1   | Barb fitting                 |                                       |
| 3          | 2   | Side spacers                 |                                       |
| 4          | 1   | Location Dowels 60lg         |                                       |
| 5          | 1   | Location Dowels 60lg_CPY     |                                       |
| 6          | 1   | Location Dowels 60lg_CPY1    |                                       |
| 7          | 1   | Location Dowels 60lg_CPY_CPY |                                       |
| 8          | 6   | ANSI B18.3.1M - M5x0.8 x 20  | Forged Socket Head Cap Screw - Metric |
| 9          | 1   | Lower plate                  |                                       |
| 10         | 1   | Target Filter Plate          |                                       |
| 11         | 1   | Top seal                     |                                       |
| 12         | 1   | Bottom seal                  |                                       |

|                    |            |             |      |                    |
|--------------------|------------|-------------|------|--------------------|
| Designed by<br>cb4 | Checked by | Approved by | Date | Date<br>16/08/2011 |
|                    |            |             |      |                    |
|                    |            | Edition     |      | Sheet<br>1 / 1     |

# Fig S1 E

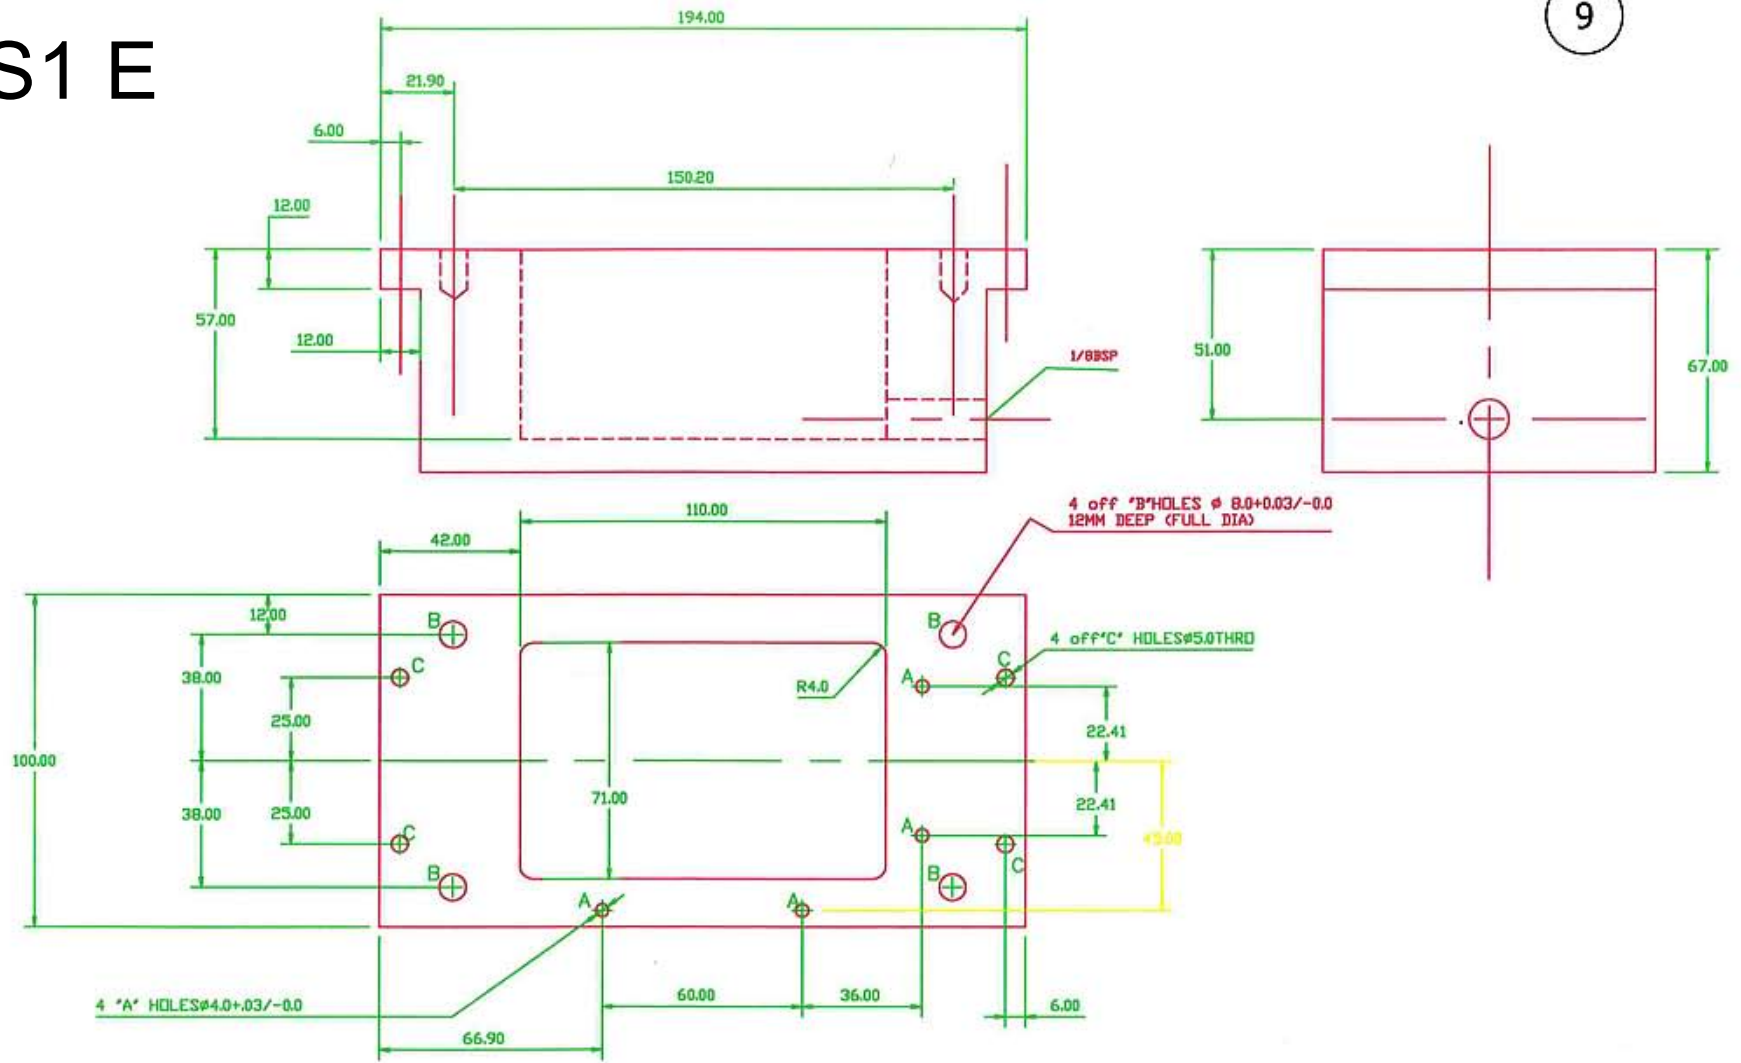

The Sanger Institute  
 Genome Campus  
 Hinxton  
 Cambs, BC6 1SA  
 Tel No 01223 834244  
 Fax No 01223 494919

|       |               |
|-------|---------------|
| Scale | NTS           |
| Drawn | Date 14/08/08 |
| Chkd  | Date 14/08/08 |
| Appd  | Date 14/08/08 |

Tolerance unless otherwise stated  
 Angular  $\pm 0.25$  deg  
 X.XX  $\pm 0.05$   
 X.X  $\pm 0.1$   
 X  $\pm 0.5$

MATERIAL  
 Aluminium Alloy 6082  
 FINISH  
 Anodise

PROJECT No  
 WS-08001

TITLE  
 Lower vac plate

DRAWING No  
 0002

REV No  
 A

# Fig S1 F

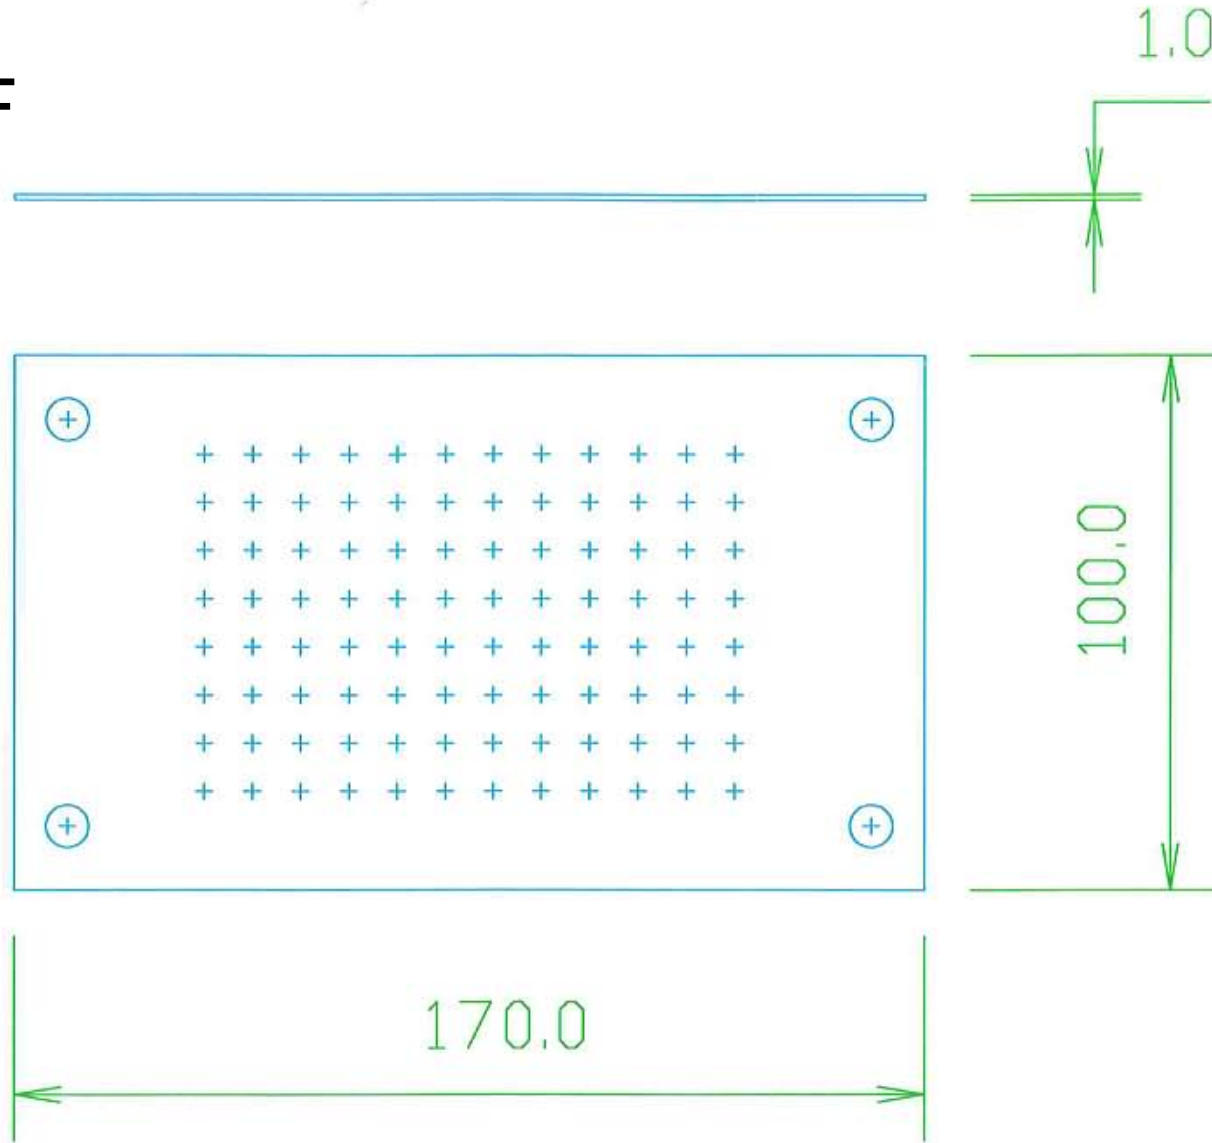

|                                                                                                                 |       |      |                                                                                                        |               |            |            |        |
|-----------------------------------------------------------------------------------------------------------------|-------|------|--------------------------------------------------------------------------------------------------------|---------------|------------|------------|--------|
| The Sanger Institute<br>Genome Campus<br>Hinxton<br>Cambs, BC6 1SA<br>Tel No 01223 834244<br>Fax No 01223494919 | Scale | NTS  | Tolerance unless otherwise stated<br>Angular +/- 0.25 deg<br>X.XX +/- 0.05<br>X.X +/- 0.1<br>X +/- 0.5 | MATERIAL      | PROJECT No | TITLE      |        |
|                                                                                                                 | Drawn | Date |                                                                                                        | SILICONE SEAL | WS-08001   | TOP GASKET |        |
|                                                                                                                 | Chkd  | Date |                                                                                                        | FINISH        | CLEAN      | DRAWING No | REV No |
|                                                                                                                 | Appd  | Date |                                                                                                        |               |            | GASKET 1   |        |



# Fig S1 G

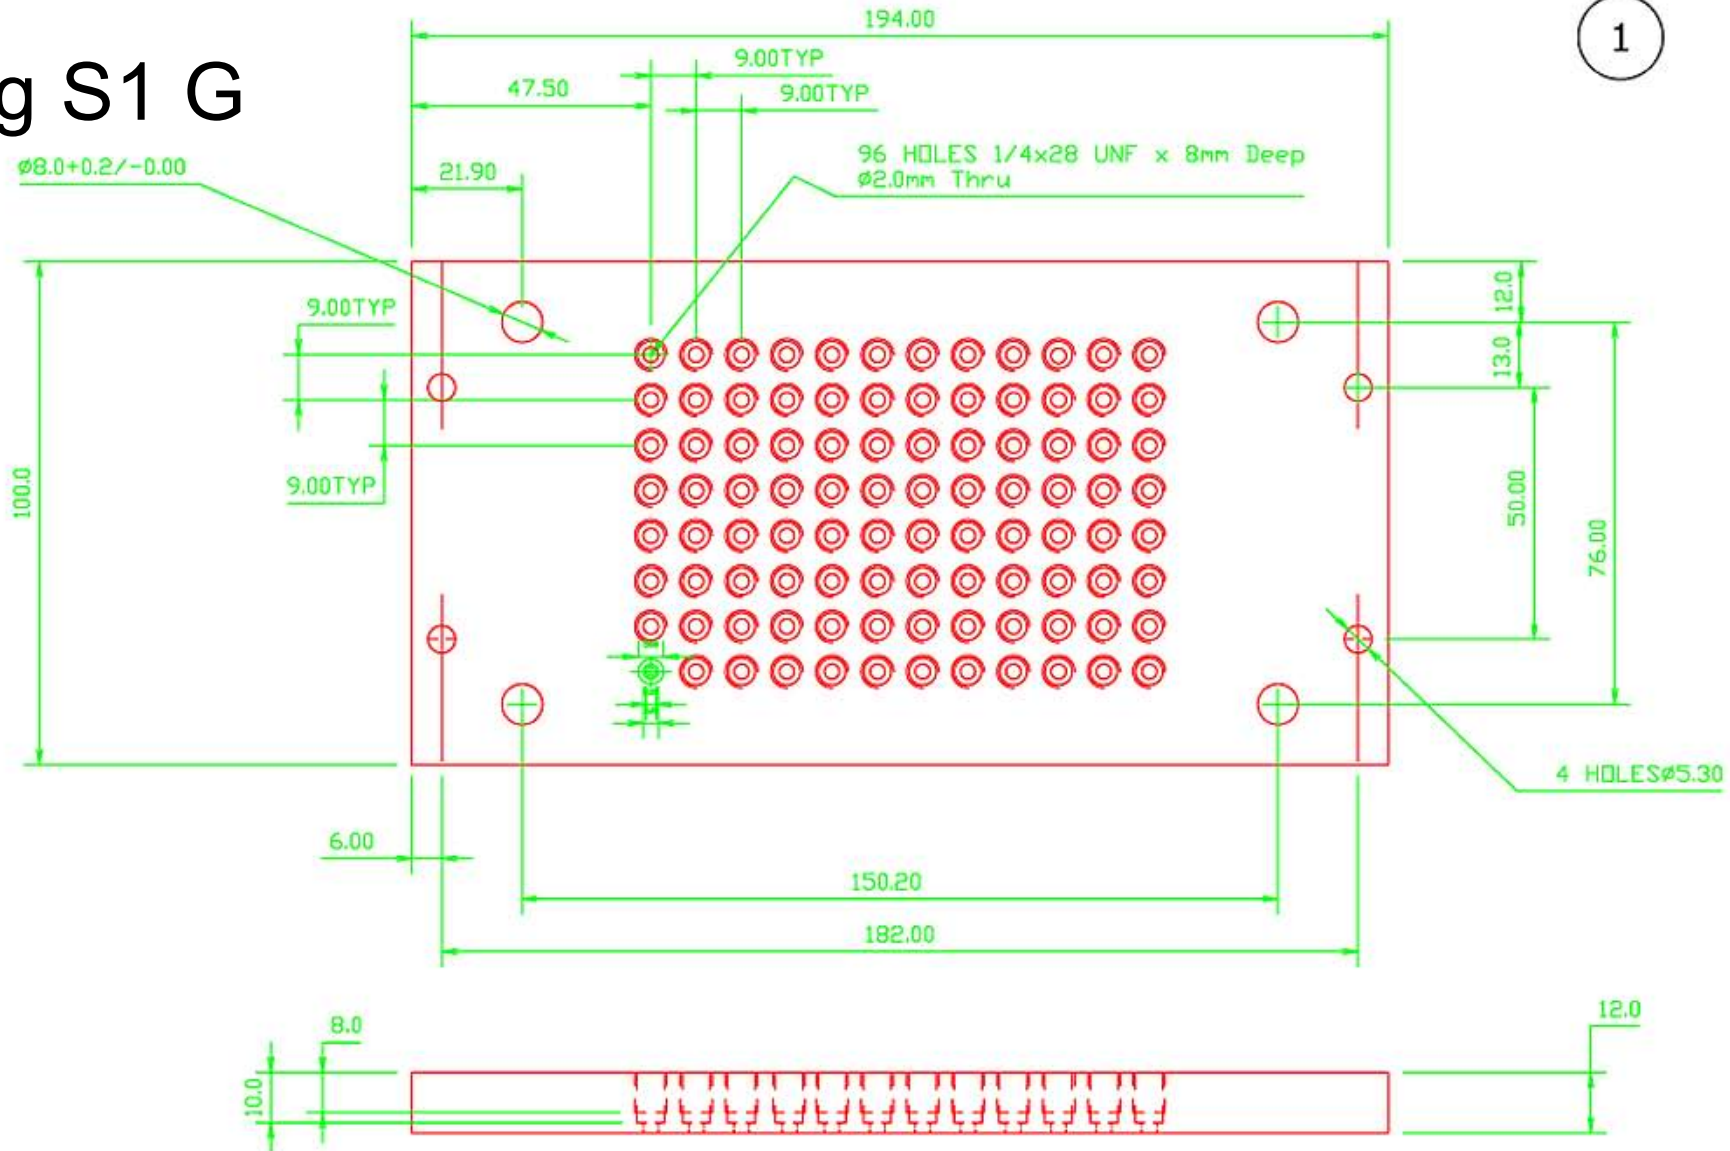

1

The Sanger Institute  
 Genome Campus  
 Hinxton  
 Cambs, BC6 1SA  
 Tel No 01223 834244  
 Fax No 01223494919

|       |      |          |
|-------|------|----------|
| Scale | NTS  |          |
| Drawn | Date | 14/08/08 |
| Chkd  | Date | 14/08/08 |
| Appd  | Date | 14/08/08 |

Tolerance unless otherwise stated  
 Angular  $\pm 0.25$  deg  
 X.XX  $\pm 0.05$   
 X.X  $\pm 0.1$   
 X  $\pm 0.5$

|          |                      |
|----------|----------------------|
| MATERIAL | Aluminium Alloy 6082 |
| FINISH   | Anodise              |

|            |          |
|------------|----------|
| PROJECT No | WS-08001 |
|------------|----------|

|            |                      |          |
|------------|----------------------|----------|
| TITLE      | Top connection plate |          |
| DRAWING No | 0001                 | REV No A |
|            |                      | A        |

# Fig S1 H

11

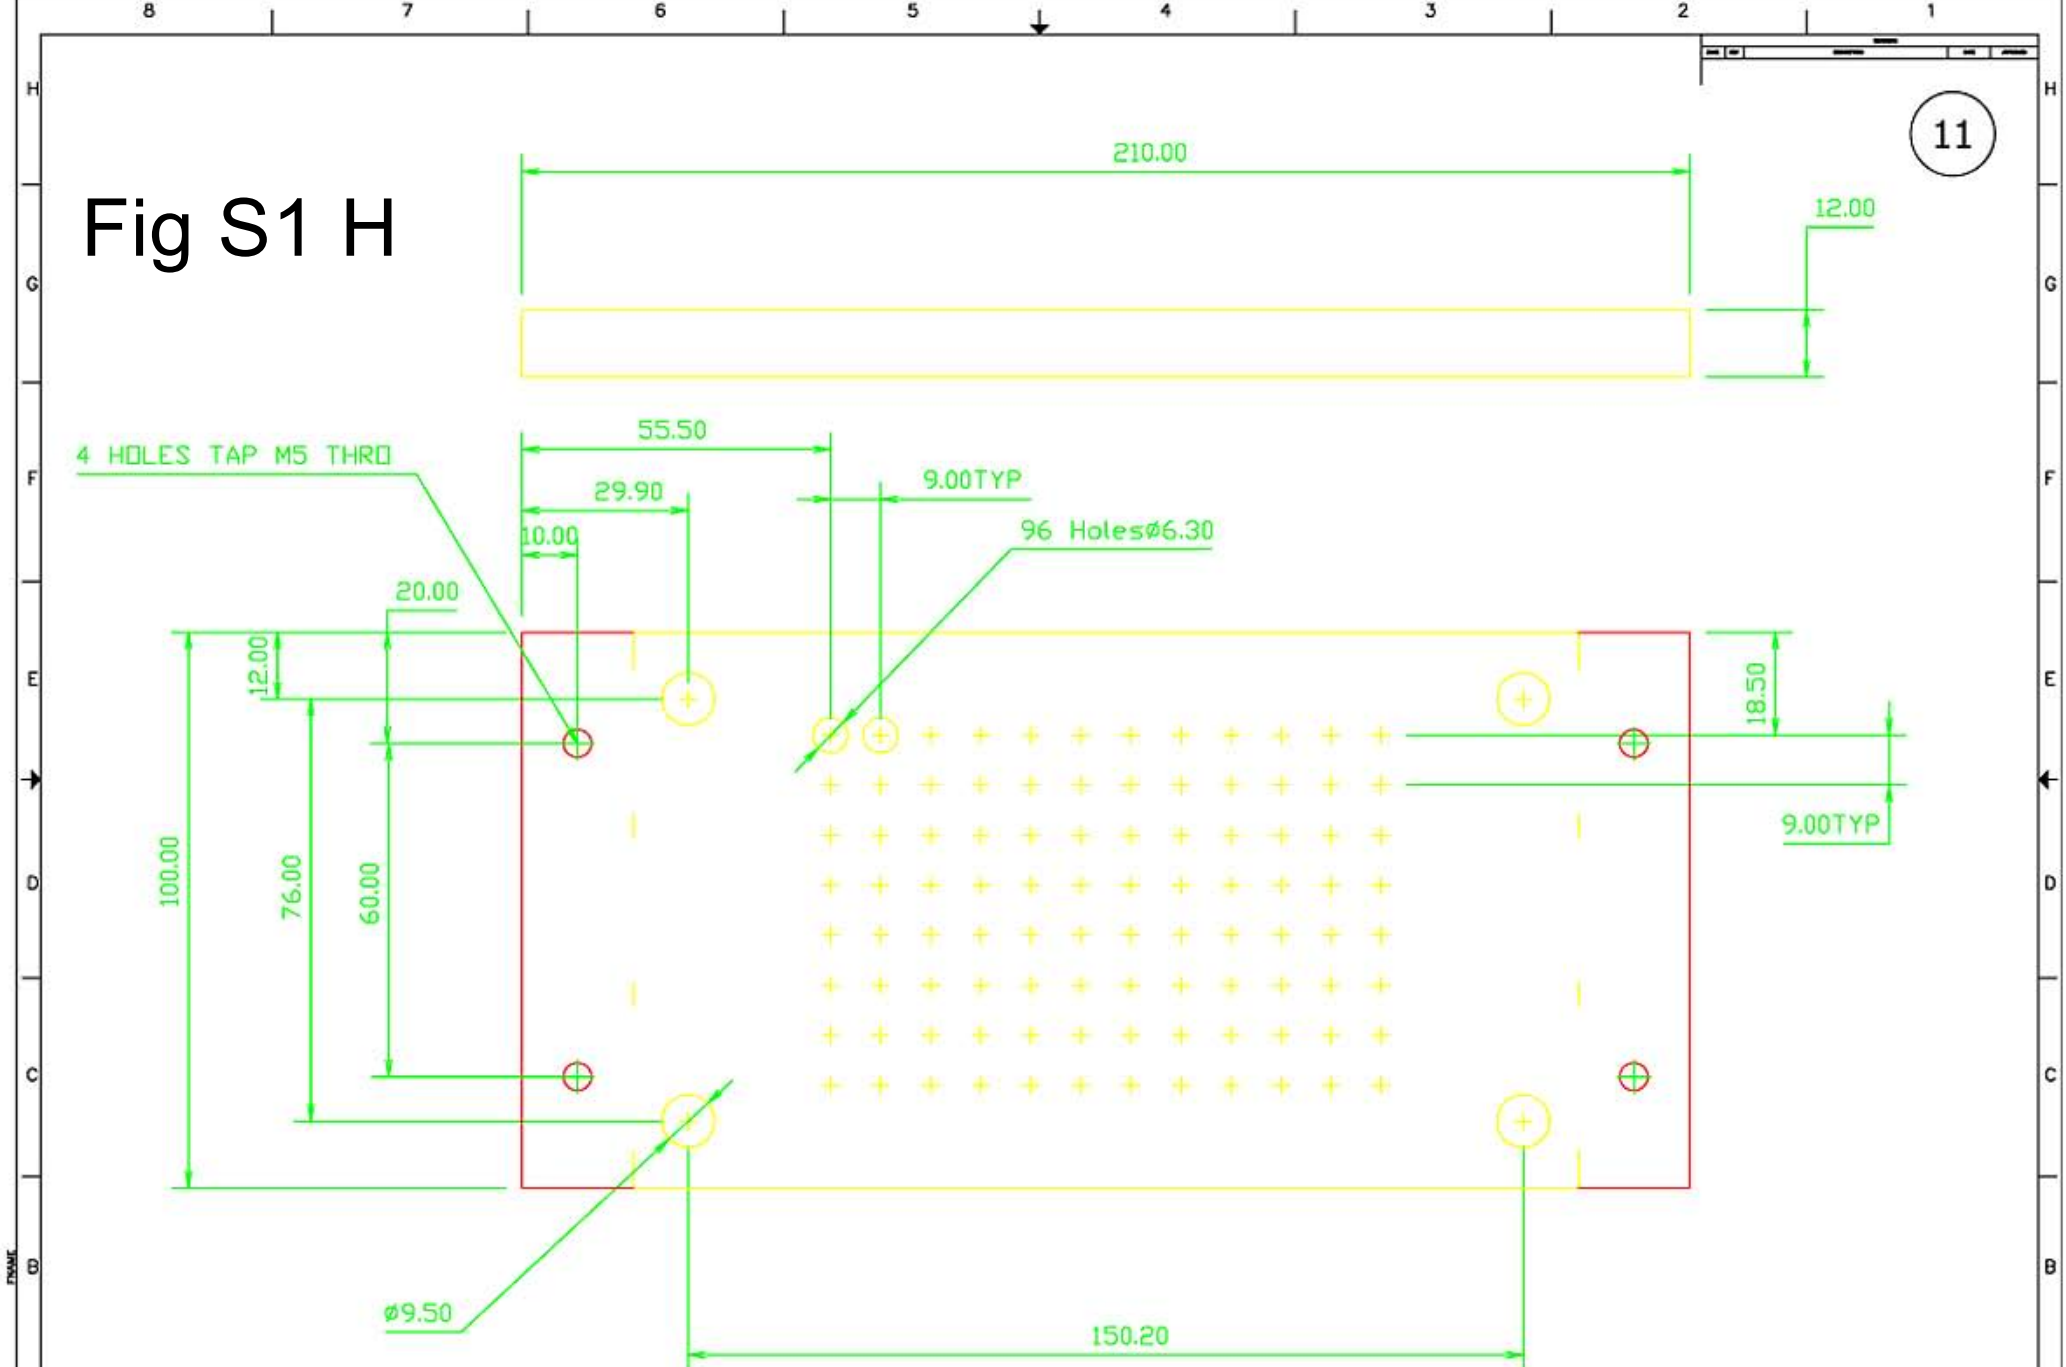

|                                                                                                                 |       |      |                                                                                                              |                      |                        |              |        |
|-----------------------------------------------------------------------------------------------------------------|-------|------|--------------------------------------------------------------------------------------------------------------|----------------------|------------------------|--------------|--------|
| The Sanger Institute<br>Genome Campus<br>Hinxton<br>Cambs, BC6 1SA<br>Tel No 01223 834244<br>Fax No 01223494919 | Scale | NTS  | Tolerance unless othwise stated<br>Angular $\pm 0.25$ deg<br>X.XX $\pm 0.05$<br>X.X $\pm 0.1$<br>X $\pm 0.5$ | MATERIAL             | PROJECT No<br>WS-08001 | TITLE        |        |
|                                                                                                                 | Drawn | Date |                                                                                                              | ALUMINIUM ALLOY 6082 |                        | TOP TEMPLATE |        |
|                                                                                                                 | Chkd  | Date |                                                                                                              | FINISH               | CLEAN                  | DRAWING No   | REV No |
|                                                                                                                 | Appd  | Date |                                                                                                              |                      |                        | 0004         |        |

# Fig S1 I

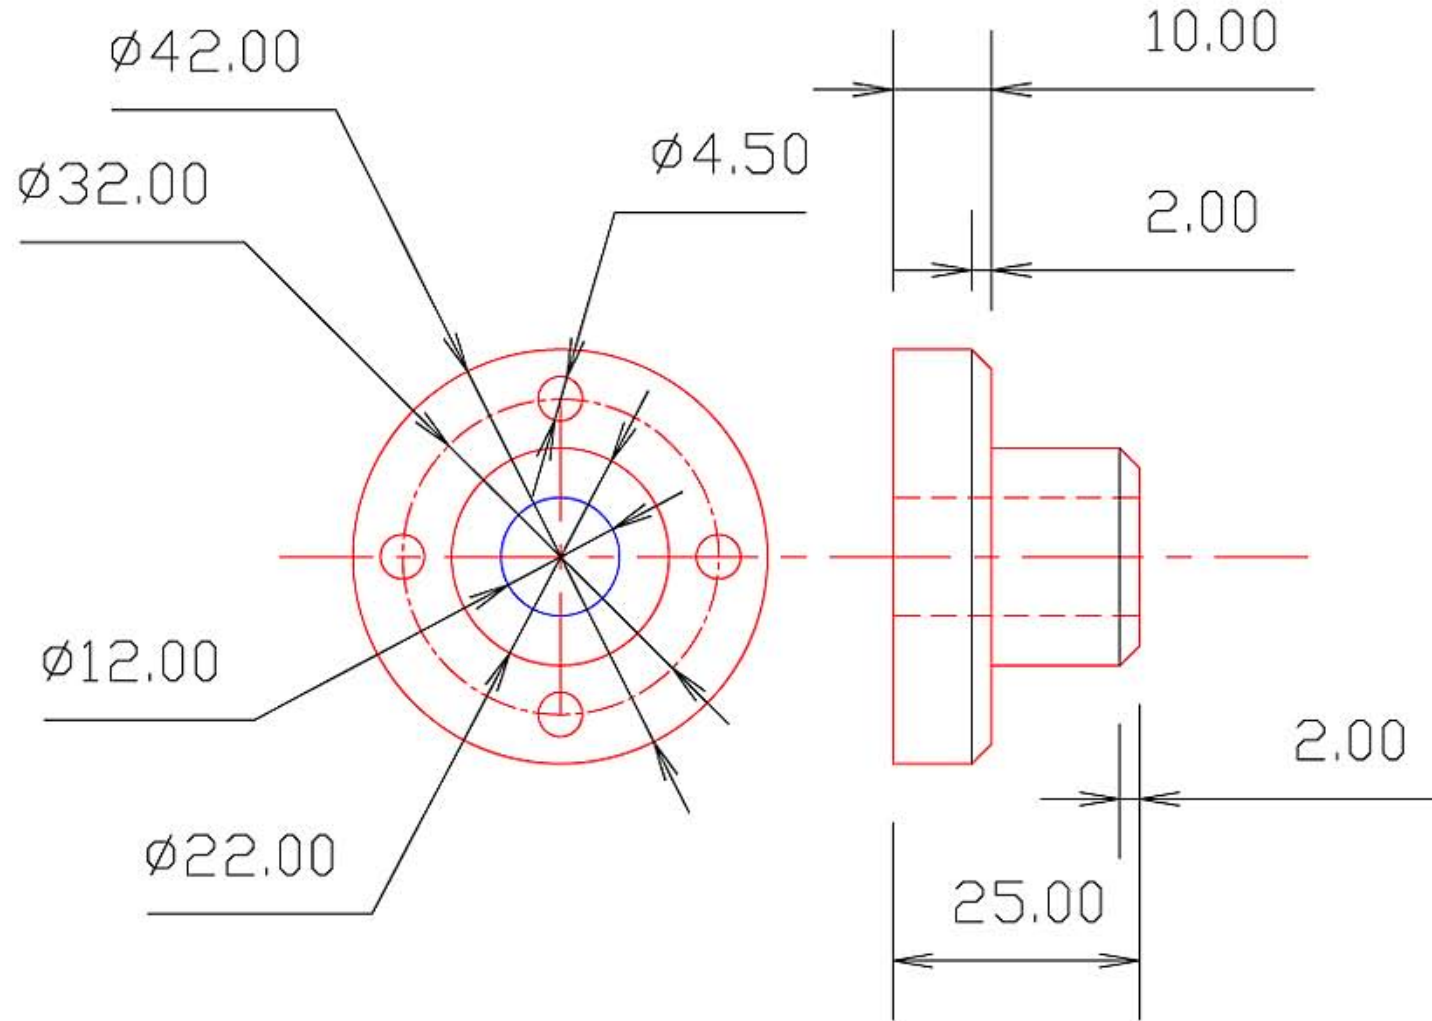

The Sanger Institute  
 Genome Campus  
 Hinxton  
 Cambs, BC6 1SA  
 Tel No 01223 834244  
 Fax No 01223494919

|       |               |
|-------|---------------|
| Scale | NTS           |
| Drawn | Date 01/12/08 |
| Chkd  | Date 01/12/08 |
| Appd  | Date 01/12/08 |

Tolerance unless othwise stated  
 Angular  $\pm 0.25$  deg  
 X.XX  $\pm 0.05$   
 X.X  $\pm 0.1$   
 X  $\pm 0.5$

|          |       |
|----------|-------|
| MATERIAL | AL/AL |
| FINISH   | CLEAN |

|            |            |
|------------|------------|
| PROJECT No | WS-2010-01 |
|------------|------------|

|       |                   |
|-------|-------------------|
| TITLE | Guide Rod Holders |
|-------|-------------------|

|            |        |
|------------|--------|
| DRAWING No | 10-004 |
|------------|--------|

|        |   |
|--------|---|
| REV No | A |
|--------|---|
